# Supplementary material
Source: MDPI journal article supplement (https://www.mdpi.com/1424-2818/12/9/363)
Supplement: s1 [file s1]

# *Phragmites australis* associates with belowground fungi communities characterized by high diversity and pathogen abundance

Carolyn S. Schroeder<sup>1</sup>, Susannah Halbrook<sup>1</sup>, Christina Birnbaum<sup>2,3</sup>, Pawel Waryszak<sup>3</sup>, William Wilber<sup>1</sup> and Emily C. Farrer<sup>1</sup>

<sup>1</sup>Department of Ecology and Evolutionary Biology, Tulane University, New Orleans, LA, 70118, USA.

<sup>2</sup>Applied Chemistry and Environmental Science, School of Science, RMIT University, Melbourne 3001, VIC, Australia

<sup>3</sup>Centre for Integrative Ecology, School of Life and Environmental Sciences, Faculty of Science & Built Environment, Deakin University, 221 Burwood Highway, Burwood 3125, VIC, Australia

Correspondence: CS Schroeder, Department of Ecology and Evolutionary Biology, Tulane University, 6823 St. Charles Ave., 400 Lindy Boggs Center, New Orleans, LA, 70118, USA.

## Supplement

**Table S1.** Effects of community type, biotic context, abiotic conditions and distance on root and soil fungal composition, richness, antilogarithm of Shannon's entropy index, inverse of Simpson's concentration index and plant pathogen abundances. Final model variables for each model are included. The three primary comparisons correspond to our three hypotheses. Results of dbRDA permutation tests are displayed for effects of community type and biotic context on composition. ANOVA results from mixed effect linear models are displayed for diversity, richness, and pathogen abundance responses. P-values less than 0.1 are bold.

| Comparison                                      | Response (df)                 | Final Model Variables | F-value | P-value           |
|-------------------------------------------------|-------------------------------|-----------------------|---------|-------------------|
| (1) Monoculture vs Native Community<br><br>Root | Composition                   | Community type        | 4.71    | <b>0.001</b>      |
|                                                 | Richness (1,146)              | Community type        | 6.83    | <b>0.009</b>      |
|                                                 | Antilogarithm Shannon (1,146) | Community type        | 8.13    | <b>0.005</b>      |
|                                                 | Inverse Simpson (1,146)       | Community type        | 14.16   | <b>0.0002</b>     |
|                                                 | Pathogen abundance (1,150)    | Community type        | 22.03   | <b>&lt;0.0001</b> |
|                                                 |                               | Nitrogen              | 8.43    | <b>0.004</b>      |

|                                            |                              |                |       |               |
|--------------------------------------------|------------------------------|----------------|-------|---------------|
| Soil                                       | Composition                  | Community type | 2.64  | <b>0.001</b>  |
|                                            |                              | pH             | 1.60  | <b>0.011</b>  |
|                                            | Richness (1,72)              | Community type | 6.07  | <b>0.02</b>   |
|                                            |                              | Nitrogen       | 8.94  | <b>0.004</b>  |
|                                            |                              | Salinity       | 14.72 | <b>0.0003</b> |
|                                            | Antilogarithm Shannon (1,72) | Community type | 3.02  | <b>0.08</b>   |
|                                            |                              | Nitrogen       | 3.12  | <b>0.08</b>   |
|                                            | Inverse Simpson (1,72)       | Community type | 9.47  | <b>0.0029</b> |
|                                            |                              | Nitrogen       | 4.94  | <b>0.03</b>   |
|                                            | Pathogen abundance (1,79)    | Biotic context | 5.02  | <b>0.003</b>  |
| (2) Monoculture center vs edge<br><br>Root | Composition                  | Biotic context | 1.64  | <b>0.006</b>  |
|                                            | Richness (1,69)              | Biotic context | 0.73  | 0.39          |
|                                            |                              | Carbon         | 5.03  | <b>0.03</b>   |
|                                            | Antilogarithm Shannon (1,71) | Biotic context | 1.85  | 0.18          |
|                                            |                              | Carbon         | 1.83  | 0.18          |
|                                            | Inverse Simpson (1,69)       | Biotic context | 1.41  | 0.24          |
|                                            |                              | Salinity       | 2.21  | 0.14          |
|                                            | Pathogen abundance (1,71)    | Biotic context | 7.88  | <b>0.006</b>  |
|                                            |                              | Nitrogen       | 4.02  | <b>0.048</b>  |

|                                                 |                              |                |      |              |
|-------------------------------------------------|------------------------------|----------------|------|--------------|
| Soil                                            | Composition                  | Biotic context | 1.81 | <b>0.001</b> |
|                                                 |                              | pH             | 2.02 | <b>0.001</b> |
|                                                 | Richness (1,70)              | Biotic context | 0.27 | 0.61         |
|                                                 |                              | Nitrogen       | 5.92 | <b>0.02</b>  |
|                                                 |                              | pH             | 5.57 | <b>0.02</b>  |
|                                                 | Antilogarithm Shannon (1,71) | Biotic context | 1.67 | 0.21         |
|                                                 |                              | Nitrogen       | 3.69 | <b>0.06</b>  |
|                                                 | Inverse Simpson (1,70)       | Biotic context | 1.25 | 0.26         |
|                                                 |                              | Nitrogen       | 4.27 | <b>0.04</b>  |
|                                                 |                              | Phosphorus     | 4.07 | <b>0.05</b>  |
|                                                 | Pathogen abundance (1,74)    | Biotic context | 2.42 | 0.12         |
| (3) Native Community center vs edge<br><br>Root | Composition                  | Biotic context | 1.05 | 0.34         |
|                                                 | Richness (1,69)              | Biotic context | 3.90 | <b>0.04</b>  |
|                                                 | Antilogarithm Shannon (1,69) | Biotic context | 5.39 | <b>0.02</b>  |
|                                                 | Inverse Simpson (1,69)       | Biotic context | 0.43 | 0.51         |
|                                                 |                              | Salinity       | 3.45 | <b>0.07</b>  |
|                                                 | Pathogen abundance (1,72)    | Biotic context | 0.61 | 0.44         |

|      |                              |                |       |               |
|------|------------------------------|----------------|-------|---------------|
| Soil | Composition                  | Biotic context | 1.12  | 0.44          |
|      |                              | pH             | 1.73  | <b>0.01</b>   |
|      | Richness (1,70)              | Biotic context | 5.67  | <b>0.02</b>   |
|      |                              | Nitrogen       | 13.22 | <b>0.0005</b> |
|      |                              | Salinity       | 13.22 | <b>0.0001</b> |
|      | Antilogarithm Shannon (1,70) | Biotic context | 1.02  | 0.32          |
|      |                              | Nitrogen       | 6.57  | <b>0.01</b>   |
|      |                              | Salinity       | 8.75  | <b>0.004</b>  |
|      | Inverse Simpson (1,71)       | Biotic context | 5.25  | <b>0.02</b>   |
|      |                              | Nitrogen       | 5.89  | <b>0.02</b>   |
|      | Pathogen abundance (1,75)    | Biotic context | 0.76  | 0.39          |
|      |                              |                |       |               |

| Table S2. Number of root samples per native species collected for each transect at each site. |               |                                  |          |
|-----------------------------------------------------------------------------------------------|---------------|----------------------------------|----------|
| Site                                                                                          | Transect      | Species                          | Count    |
| Barataria Preserve                                                                            | Native center | <i>Eleocharis sp.</i>            | <b>5</b> |
|                                                                                               |               | <i>Schoenoplectus americanus</i> | <b>1</b> |
|                                                                                               | Native edge   | <i>Eleocharis sp.</i>            | <b>5</b> |
|                                                                                               |               | <i>Sacciolepis striata</i>       | <b>1</b> |
| Turtle Cove Research Station                                                                  | Native center | <i>Polygonum punctatum</i>       | <b>3</b> |
|                                                                                               |               | <i>Eleocharis sp.</i>            | <b>2</b> |

|                          |               |                                  |   |
|--------------------------|---------------|----------------------------------|---|
|                          |               | <i>Schoenoplectus americanus</i> | 1 |
|                          |               | <i>Spartina patens</i>           | 1 |
|                          | Native edge   | <i>Polygonum punctatum</i>       | 3 |
|                          |               | <i>Paspalum dissectum</i>        | 2 |
|                          |               | <i>Spartina patens</i>           | 2 |
| Pearl River WMA          | Native center | <i>Juncus roemarinus</i>         | 1 |
|                          |               | <i>Schoenoplectus americanus</i> | 3 |
|                          |               | <i>Spartina patens</i>           | 3 |
|                          | Native edge   | <i>Schoenoplectus americanus</i> | 2 |
|                          |               | <i>Spartina patens</i>           | 5 |
| Bayou Sauvage NWR        | Native center | <i>Spartina patens</i>           | 7 |
|                          | Native edge   | <i>Spartina patens</i>           | 6 |
|                          |               | <i>Ipomoea saggitata</i>         | 1 |
| Fontainebleau State Park | Native center | <i>Spartina patens</i>           | 5 |
|                          |               | <i>Schoenoplectus americanus</i> | 1 |
|                          | Native edge   | <i>Spartina patens</i>           | 5 |
|                          |               | <i>Schoenoplectus americanus</i> | 2 |
| Big Branch NWR           | Native center | <i>Spartina patens</i>           | 6 |
|                          |               | <i>Juncus roemarinus</i>         | 1 |
|                          | Native edge   | <i>Spartina patens</i>           | 5 |
|                          |               | <i>Schoenoplectus americanus</i> | 2 |

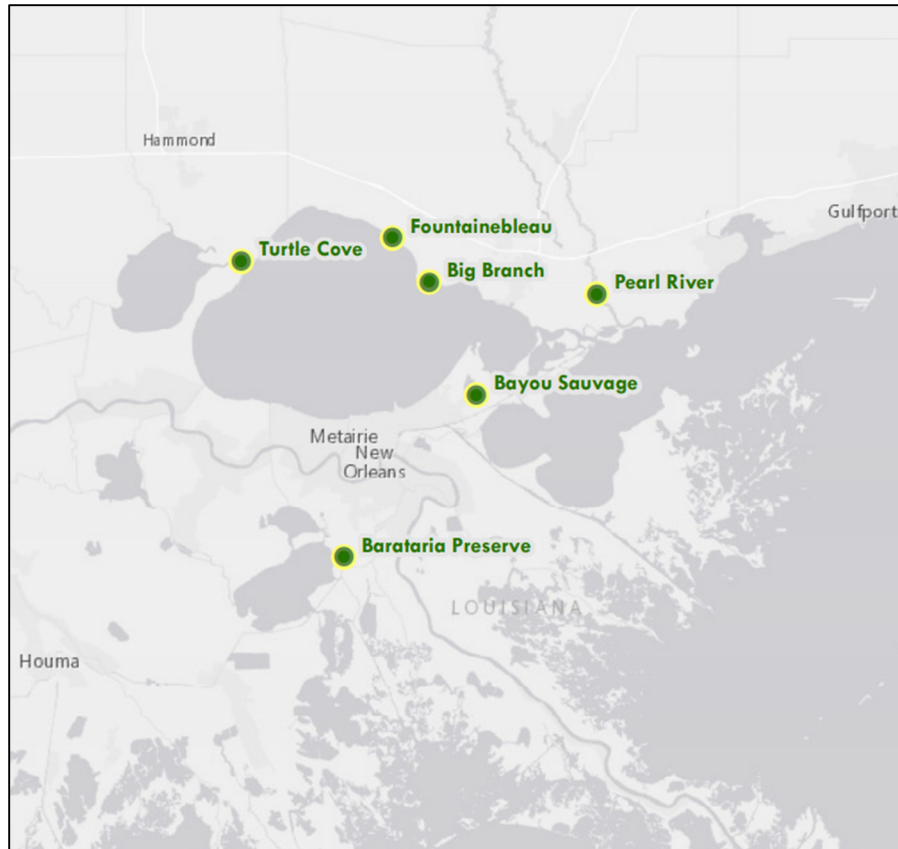

**Figure S1.** Map showing locations of the six *Phragmites australis* invaded field sites in Southern Louisiana.

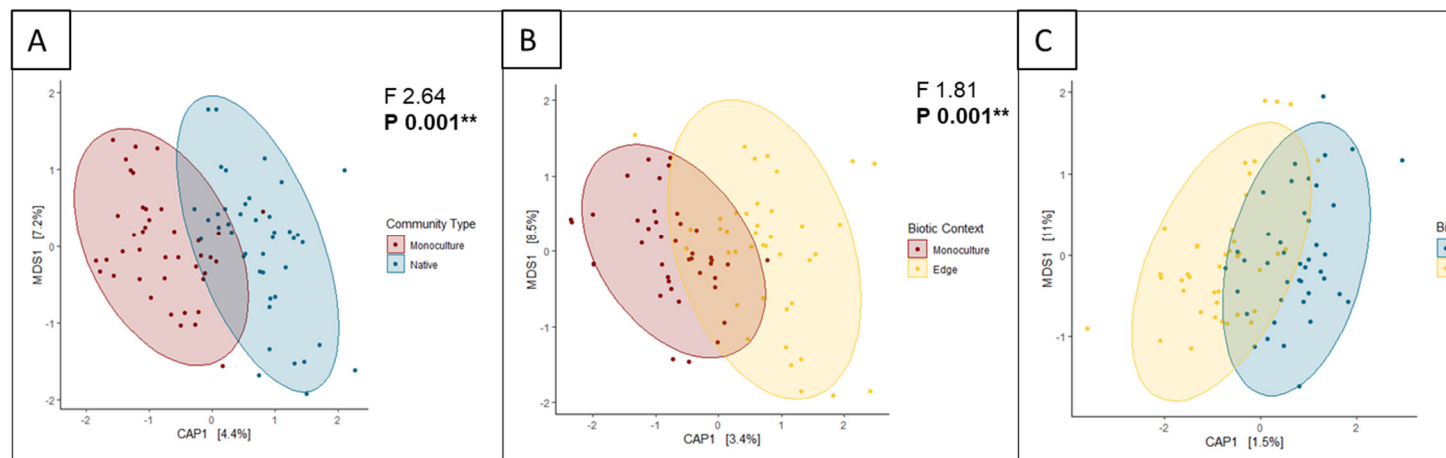

**Figure S2.** Constrained ordinations showing the effect of community type and biotic context on soil fungal composition. Each point represents an individual soil sample. Ellipses represent a 95% confident interval for each group. Soil fungal composition differed significantly between the monoculture and native community types (A). Soil fungal composition also differed between the center and edge biotic contexts within the monoculture community (B). There was no difference in soil fungal composition between the center and edge biotic contexts within the native community (C). P-values less than 0.1 are highlighted in bold and labeled with the following notation: + $P < 0.1$ , \* $P < 0.05$ , \*\* $P < 0.01$ , \*\*\* $P < 0.001$ .
